RESEARCH ARTICLE

# Prevalence and associated factors of pterygium among adults living in Gondar city, Northwest Ethiopia

Dereje Hayilu Anbesse<sup>1\*</sup>, Tsehay Kassa<sup>1</sup>, Biruktayit Kefyalew<sup>1</sup>, Atirsaw Tasew<sup>1</sup>, Abie Atnie<sup>1</sup>, Beredu Desta<sup>1</sup>

Department of Optometry, School of Medicine, College of Medicine Health Science, University of Gondar, Gondar city, Ethiopia

<sup>1</sup> These authors contributed equally to this work.

\* [derejemk2004@gmail.com](mailto:derejemk2004@gmail.com)

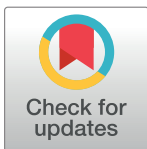

## Abstract

### Purpose

The aim of this study was to assess the prevalence and associated factors of pterygium among adults living in Gondar city, Northwest Ethiopia.

### Methods

A cross sectional design study was carried out in 390 participants in Gondar city from April 15 to May 7, 2016. Basic ophthalmic examination was performed using portable slit lamp, 3.5x magnifying loop with torch light and a pretested and structured questionnaire was completed. The raw data has been entered into EPI INFO 3.5.1 and analyzed by SPSS version 20. Descriptive statistics was summarized descriptive data. Logistic regression was used to summarize the predictors of pterygium. The variables with p-value less than 0.05 were considered as significant risks of pterygium.

### Result

The prevalence of pterygium among study participants was 151(38.7% (95%CI: 33.8–43.8)). Among those who have pterygium, 149(98.7%) were developed pterygium on the nasal side and 15(9.9%) on temporal side of the either eye and 13(8.6%) have both. Age between 41-60(AOR = 2.20(95%CI: 1.22, 3.39)), age between 61-86(AOR = 7.97(95%CI: 2.74, 23.17)), male sex (AOR = 2.20(95%CI: 1.28, 3.82)), outdoor working area(AOR = 3.75(95%CI: 2.18, 6.46)), the use of traditional eye medication (AOR = 2.55 (95%CI: 1.04, 5.90)) and family history of pterygium (AOR = 6.68(95% CI: 2.53, 17.60)) were positively associated with pterygium whereas use of sunglass/hat (AOR = 0.40(95%CI:0.20, 0.78)) was negatively associated.

### Conclusion

There is a high prevalence of pterygium in Gondar city northwest Ethiopia. Old age, male sex, outdoor working area, utilization of traditional eye medication and family history of

## OPEN ACCESS

**Citation:** Anbesse DH, Kassa T, Kefyalew B, Tasew A, Atnie A, Desta B (2017) Prevalence and associated factors of pterygium among adults living in Gondar city, Northwest Ethiopia. PLoS ONE 12(3): e0174450. <https://doi.org/10.1371/journal.pone.0174450>

**Editor:** Andreas Wedrich, Medizinische Universitat Graz, AUSTRIA

**Received:** October 31, 2016

**Accepted:** March 9, 2017

**Published:** March 30, 2017

**Copyright:** This is an open access article, free of all copyright, and may be freely reproduced, distributed, transmitted, modified, built upon, or otherwise used by anyone for any lawful purpose. The work is made available under the [Creative Commons CC0](https://creativecommons.org/licenses/by/4.0/) public domain dedication.

**Data Availability Statement:** All relevant data are within the paper and its supporting information files.

**Funding:** The study was funded by University of Gondar and the funding is specifically for designing of the study, field work, analysis and write up. There was no specific fund for publication fee.

**Competing interests:** The authors have declared that no competing interests exist.

pterygium were statistically significant predictors of pterygium. The use of sunglasses/hat was protective against pterygium.

## Introduction

Pterygium is a wingy shaped fibro vascular growth of the conjunctiva on to the cornea usually nasally. It occurs in the palpebral fissure area, much more often nasally than temporally, although either or both ("double" pterygium) can occur [1]. It can induce significant astigmatism and cause visual impairment. Pterygium is often preceded by a related non-cancerous condition called pingueculum. Its main clinical presentations are redness, irritation, decreased vision and ocular discomfort. It may also be asymptomatic [2, 3].

If pterygium is left untreated and its associated risk factors are not avoided or reduced, it can result in visual impairment or blindness due to fibro vascular coverage of conjunctiva over the visual axis of the cornea. This is due to the induction of astigmatism and opacity [4, 5]. It is a common external ocular disease with prevalence ranging between 0.3% and 36.6% globally. The prevalence rate of pterygium varies widely with the variation of altitude, age, gender, occupation and socio economic status. The prevalence rate of 3.0% among patients attending ophthalmology clinic in Ankara, Turkey, 12.5% among motorcyclists in Benin city, Nigeria and 8.8% in Meskan district of Southern Ethiopia were reported [6–8].

Even though the aetiology of pterygium is ill defined, there are factors which associated with formation of pterygium such as outdoor working environment, age being old, male sex, living in an area with higher exposure of ultraviolet radiation, dry and windy climate [9–11]. The study conducted in Blue Mountain, Australia, found a significant association between pterygium and increased pigmentation (skin and hair color), decreased skin sun sensitivity and sun related skin damage [12]. The study area is located in the tropics, where the prevalence of pterygium is not well studied previously especially the associated factors of pterygium. Therefore, this study aimed to determine the magnitude of pterygium and its associated factors among adults so that awareness creating about avoidance of risk factors, regular screening programs for prevention and early intervention will be planned and implemented.

## Materials and methods

### Study design, setting and sampling

A population based cross sectional design study was conducted with adults in Gondar city from April 15 to May 7, 2016. Gondar city is located in North Gondar zone 748 km from the capital city Addis Ababa with a total population of 225,125. It has an altitude of 2,200m above sea level with warm and dry weather condition. It has 10 sub-cities hosting approximately 53,725 households. There is one tertiary eye care and training center with a catchment population of about 14 million.

A total of 425 sample size was determined by single proportional formula by considering 10% non response rate and two design effect. In the study, 399 study participants were recruited and completed a questionnaire along with a basic ophthalmic examination. This corresponds to a 91.76% response rate. A Multistage systematic random sampling technique using two stages of sampling process has been used. First, four kebeles (smallest administrative unit hosting about 2000 households) out of twenty four kebeles was selected using simple random sampling method. Then systematic random sampling method was used to select participating households proportionally (every 24<sup>th</sup> households). Finally one adult in each

participating household with age greater than 20 years old was randomly selected and recruited as study participant.

The study was conducted in accordance with the Declaration of Helsinki and approved by the University of Gondar Ethical Review Board. In accordance with the Ethiopian National Research Ethics Review Guideline, verbal informed consent was obtained from all adults greater than age 20 years old using an information sheet in the local language “Amharic”. Since the study didn’t involve invasive eye examination procedures, the university ethical review board approved verbal informed consent. The study participants’ agreements were first obtained verbally prior to data collection. Then the data was collected by trained senior optometrists. Those adults who had pterygium were prescribed sunglasses and referred to the University of Gondar tertiary eye care and training center for detail examination and management.

## Definition of pterygium

Pterygium: defined as presence of any size of wingy shaped fibro-vascular growth of the conjunctiva that extends to the cornea and/ or those individuals who have history of pterygium surgery

Grade one: wingy shaped fibro-vascular growth of the conjunctiva extends less than 2 mm onto the cornea

Grade two: wingy shaped fibro-vascular growth of the conjunctiva that involves up to 4 mm of the cornea

Grade three: wingy shaped fibro-vascular growth of the conjunctiva that encroaches onto more than 4 mm of the cornea and involves the visual axis

## Data collection

The pre-tested and structured questionnaire of local language ‘Amharic’ was used to carry out interview with adults greater than 20 years old ([S1 Questionnaire](#)). Regular check-up for completeness and consistency of the data was made on daily basis. On the field work, data quality was insured through cross-checking 5% of the sample by principal investigators. The collected data has been checked for accuracy and completeness by the principal investigators. The data collected from the study participants included: socio economic and demographic factors, behavioral and environmental factors. Standard basic ophthalmic examinations by using portable slit lamp, 3.5X magnified loop, and torch light were done for all participants by senior Optometrist. Examination findings were recorded in English.

## Statistical analysis

The raw data has been entered into EPI INFO 3.5.1. After data was coded and cleaned, it was exported to and analyzed by using SPSS version 20. Descriptive factors have been summarized by frequency and proportions, and summary statistics such as mean, standard deviation and ranges. The analytical statistics was done by using bivariate and multivariate logistic regression. Those variables with 95% CI and p-value less than 0.05 were considered as statistically significant factors of pterygium.

## Results

A total of 390 study participants with response rate of 91.76% were involved in the study. Among them 222 (56.9%) of the respondents were females. The mean age of study participants was  $38.69 \pm 15.83$  (range 20 to 88) years. The majority of respondents 120 (30.8%) were

**Table 1. Socio demographic characteristics of study participants among adults living in Gondar city, Northwest Ethiopia, 2016.**

| Variables           | Frequency | Percentage |
|---------------------|-----------|------------|
| Age                 |           |            |
| 20–40               | 249       | 63.8       |
| 41–60               | 105       | 26.9       |
| 61–88               | 36        | 9.2        |
| Sex                 |           |            |
| Male                | 168       | 43.1       |
| Female              | 222       | 56.9       |
| Marital status      |           |            |
| Single              | 112       | 28.7       |
| Married             | 209       | 53.6       |
| Divorced            | 31        | 7.9        |
| Widowed             | 38        | 9.7        |
| Educational status  |           |            |
| No                  | 120       | 30.8       |
| Religious education | 20        | 5.1        |
| Primary school      | 110       | 28.2       |
| Secondary school    | 96        | 24.6       |
| College/university  | 44        | 11.3       |

<https://doi.org/10.1371/journal.pone.0174450.t001>

illiterate and 123 (31.5%) of them were merchants in occupation. Majority of the respondents 295 (75.6%) were orthodox and 83 (21.3%) of the respondents were Muslims. [Table 1.](#)

The prevalence of pterygium among study participants was 151(38.7% (95%CI; 33.8–43.8)). Among those who have pterygium, 149(98.7%) were developed pterygium on the nasal side and 15(9.9%) on temporal side of the either eye and 13(8.6%) have both. One fourth of them 97 (24.87%) had grade one. [Table 2.](#)

In bivariate analysis, old age, sex being male, marital status being single, divorced and widowed, educational status being no, primary and religious, outdoor working area, large family size, medium monthly income, current drinking alcohol, past and current smoking, family history of pterygium, the use of traditional medication were associated with pterygium. In multivariate logistic regression; old age, sex being male, outdoor working area, the use of sunglass/

**Table 2. Magnitude, location and grades of pterygium among study participants of adults living in Gondar city, Northwest Ethiopia, 2016.**

| Variables          | Frequency | Percent |
|--------------------|-----------|---------|
| Pterygium(n = 390) |           |         |
| Yes                | 151       | 38.7    |
| No                 | 239       | 61.3    |
| Pterygium location |           |         |
| Nasal              | 149       | 98.7    |
| Temporal           | 15        | 9.9     |
| Pterygium grade    |           |         |
| Grade one          | 97        | 64.2    |
| Grade two          | 52        | 34.4    |
| Grade three        | 9         | 5.9     |

<https://doi.org/10.1371/journal.pone.0174450.t002>

hat, the use of traditional eye medication and family history of pterygium were statistically and independently associated with pterygium.

As a result, those participants with early old age (41–60 years) are 2.20 times more likely to develop pterygium as compared to those adults (20–40) years of age (AOR = 2.20(95%CI: 1.22, 3.39)). Those with late old age (61–86 years) are 7.97 times more likely to develop pterygium as compared to those adults years of age (AOR = 7.97(95%CI: 2.74, 23.17)). Male sex is 2.20 times more likely to have pterygium than females (AOR = 2.20(95%CI: 1.28, 3.82)). Outdoor working environment is 3.75 more likely to have pterygium as compared to indoor working area (AOR = 3.75(95%CI: 2.18, 6.46)). In this study, the use of sunglasses/hat is 0.40 less likely to have pterygium as compared to non-using (AOR = 0.40(95%CI: 0.20, 0.78)). The use of traditional eye medication is 2.55 times more likely to develop pterygium than non-user (AOR = 2.55 (95%CI: 1.04, 5.90)). Positive family history is 6.68 more likely to have pterygium than negative family history (AOR = 6.68(95% CI: 2.53, 17.60)). [Table 3](#).

## Discussion

The prevalence of pterygium among study participants was 151(38.7% (95%CI; 33.8–43.8)). This is one of the highest magnitudes of pterygium among different epidemiological studies. It is in line with the study conducted in Amazon forest of Brazil (36.6%) and in the rural area of Doumen county, China (37.46%) [13,14]. In comparison to the study conducted in Japanese population aged 40 years and above (30.8%), the present day result is higher [9]. There were many epidemiological studies showing low prevalence of pterygium. For instance the prevalence rate of pterygium was 19.6% in central Myanmar, 12.5% in Nigeria, 8.8% southern Ethiopia and 8.47% in central India [5, 7, 8, 10]. The discrepancy observed might be due to the variation of geographical and climatic setting, sun light and ultraviolet exposure, age, economic situation and the use of traditional medication.

Those participants with early old age (41–60 years) were 2.20 times more likely to develop pterygium as compared to adults (20–40) years of age (AOR = 2.20(95%CI: 1.22, 3.39)). Those with late old age (61–86 years) were 7.97 times more likely to develop pterygium as compared to those adults years of age (AOR = 7.97(95%CI: 2.74, 23.17)). There were a plenty of previous studies which support this finding. The south western Island of Japan and Barbados Eye Study which published in 2009 and 2001 respectively reported a positive association between pterygium and an old age [9, 15]. As age increases the exposure to predictors such as ultraviolet light, outdoor working habit, dust particles will increase the precipitation of pterygium.

Male sex was 2.20 times more likely to have pterygium than females (AOR = 2.20(95%CI: 1.28, 3.82)). The present finding was correlated with the Southern Harbin eye study and Beijing eye study which indicated that men population were heavily engaged in outdoor work activities and exposed to dust particles and ultraviolet light so that they are more prone to be affected by pterygium. On the contrary, the two studies done in China reported that women are at higher risk than men to develop pterygium. This is due to that in Tibet, women are fully engaged in outdoor job and traditionally they do not wear sunglasses [16, 17].

The recent study found positive association between outdoor working environment and pterygium (AOR = 3.75(95%CI: 2.18, 6.46)). Different authors reported similar finding. At an outdoor environment, high light reflectivity, including from sand and water cause damage to limbal stem cells by ultraviolet light and by activation of matrix metalloproteinase and leads to pterygium [18].

The other result from recent study was, the negative association between the use of sunglasses/hat and pterygium (AOR = 0.40(95%CI: 0.20, 0.78)). This result is conjugate with the reports of Barbados eye study and study among motorcyclist in Nigeria and together they

**Table 3. Factors associated with pterygium of study participants among adults living in Gondar city, Northwest Ethiopia, 2016.**

| Variables                                | Pterygium |     |                   |                   |         |
|------------------------------------------|-----------|-----|-------------------|-------------------|---------|
|                                          | Yes       | No  | COR(95%CI)        | AOR (95%CI)       | p-value |
| <b>Age</b>                               |           |     |                   |                   |         |
| 20–40                                    | 69        | 180 | 1.00              | 1.00              |         |
| 41–60                                    | 54        | 51  | 2.76(1.72, 4.43)  | 2.20(1.22, 3.39)  | 0.009   |
| 61–86                                    | 28        | 8   | 9.13(3.97, 21.00) | 7.97(2.74, 23.17) | 0.000   |
| <b>Sex</b>                               |           |     |                   |                   |         |
| Male                                     | 85        | 83  | 2.42(1.59, 3.67)  | 2.20(1.28, 3.82)  | 0.005   |
| Female                                   | 66        | 156 | 1.00              | 1.00              |         |
| <b>Marital status</b>                    |           |     |                   |                   |         |
| Single                                   | 18        | 94  | 1.00              |                   |         |
| Married                                  | 95        | 114 | 4.35(2.45, 7.72)  |                   |         |
| Divorced                                 | 17        | 14  | 6.34(2.66, 15.12) |                   |         |
| Widowed                                  | 21        | 17  | 6.45(2.86, 14.56) |                   |         |
| <b>Educational status</b>                |           |     |                   |                   |         |
| No                                       | 58        | 62  | 4.21(1.80, 9.80)  |                   |         |
| Religious                                | 13        | 7   | 8.36(2.53, 27.64) |                   |         |
| Primary                                  | 45        | 65  | 3.11(1.32, 7.33)  |                   |         |
| Secondary                                | 27        | 69  | 1.76(0.73, 4.27)  |                   |         |
| College/university                       | 8         | 36  | 1.00              |                   |         |
| <b>Family size</b>                       |           |     |                   |                   |         |
| 0–3                                      | 61        | 127 | 1.00              |                   |         |
| 4–6                                      | 65        | 98  | 1.38(0.89, 2.14)  |                   |         |
| 7–10                                     | 25        | 14  | 3.72(1.80, 7.65)  |                   |         |
| <b>Monthly income</b>                    |           |     |                   |                   |         |
| 30–1000                                  | 107       | 170 | 0.63(0.21, 1.84)  |                   |         |
| 1001–3000                                | 37        | 62  | 0.60(1.94, 1.84)  |                   |         |
| 3001–6000                                | 7         | 7   | 1.00              |                   |         |
| <b>Working area</b>                      |           |     |                   |                   |         |
| Indoor                                   | 60        | 166 | 1.00              | 1.00              |         |
| Outdoor                                  | 91        | 73  | 3.45(2.25, 5.28)  | 3.75(2.18, 6.46)  | 0.000   |
| <b>Dust exposure</b>                     |           |     |                   |                   |         |
| no                                       | 61        | 116 | 1.00              |                   |         |
| Yes                                      | 90        | 123 | 1.39(0.92, 2.10)  |                   |         |
| <b>Use of sunglass/hat</b>               |           |     |                   |                   |         |
| No                                       | 125       | 186 | 1.00              | 1.00              |         |
| Yes                                      | 26        | 53  | 0.73(0.43, 1.23)  | 0.40(0.20, 0.78)  | 0.007   |
| <b>Smoking</b>                           |           |     |                   |                   |         |
| Never                                    | 131       | 229 | 1.00              |                   |         |
| Past                                     | 10        | 5   | 3.50(1.17, 10.45) |                   |         |
| Current                                  | 10        | 5   | 3.50(1.17, 10.45) |                   |         |
| <b>Alcohol drinking</b>                  |           |     |                   |                   |         |
| Never                                    | 99        | 188 | 1.00              |                   |         |
| Past                                     | 21        | 21  | 1.90(0.99, 3.64)  |                   |         |
| Current                                  | 31        | 30  | 1.96(1.12, 3.43)  |                   |         |
| <b>Use of traditional eye medication</b> |           |     |                   |                   |         |
| No                                       | 126       | 227 | 1.00              | 1.00              |         |
| Yes                                      | 25        | 12  | 3.75(1.82, 7.73)  | 2.55(1.04, 5.90)  | 0.028   |

(Continued)

**Table 3.** (Continued)

| Variables                   | Pterygium |     |                   |                   |       |
|-----------------------------|-----------|-----|-------------------|-------------------|-------|
| Family history of pterygium |           |     |                   |                   |       |
| No                          | 124       | 231 | 1.00              | 1.00              |       |
| Yes                         | 27        | 8   | 6.29(2.77, 14.26) | 6.68(2.53, 17.60) | 0.000 |

<https://doi.org/10.1371/journal.pone.0174450.t003>

suggested that the use of sunglasses/hat reduces the risk of developing pterygium by absorbing and reducing the exposure of harmful ultraviolet light [7, 19].

The utilization of traditional eye medication was also one of the positive predictors of pterygium in this study (AOR = 2.55 (95%CI: 1.04, 5.90)). The previous study done in Limpopo province of South Africa reported the similar result which suggested that the use of traditional eye medicine implicates hereditary predisposition to pterygium occurrence [20].

Finally, positive family history was positively associated with pterygium development (AOR = 6.68(95% CI: 2.53, 17.60)). The Limpopo study also reported the same finding. This might be due to that pterygium is hereditary and hared environment of the affected individuals and their family [20].

The current study has some important limitations: Some of the data were self-reported and subject to recall bias from participants. We didn't conduct laboratory investigations to explore other related data with pterygium.

## Conclusion

There is a high prevalence of pterygium in Gondar city northwest Ethiopia. Old age, male sex, outdoor working area, utilization of traditional eye medication and family history of pterygium were statistically significant predictors of pterygium. The use of sunglasses/hat was a significant protective factor for pterygium occurrence.

## Supporting information

**S1 Questionnaire. Questionnaire and data extraction form to study prevalence and associated factors of pterygium at Gondar city, Northwest Ethiopia, 2016.**  
(DOCX)

## Acknowledgments

We would like to thank university of Gondar for diagnostic materials support to conduct the study. We are also very grateful to the study participants.

## Author Contributions

**Conceptualization:** DHA.

**Data curation:** DHA TK BK AT AA BD.

**Formal analysis:** DHA.

**Funding acquisition:** DHA TK BK TA AA BD.

**Investigation:** DHA TK BK TA AA BD.

**Methodology:** DHA TK BK TA AA BD.

**Project administration:** DHA.

**Resources:** DHA TK BK AT AA BD.

**Supervision:** DHA.

**Validation:** DHA TK BK AT AA BD.

**Visualization:** DHA TK BK AT AA BD.

**Writing – original draft:** DHA TK BK AT AA BD.

**Writing – review & editing:** DHA TK BK AT AA BD.

## References

1. Chui J, Coroneo MT, Tat LT, Crouch R, Wakefield D, Girolamo N. Ophthalmic Pterygium: A Stem Cell Disorder with Premalignant Features. *The American Journal of Pathology*. 2011 February; 178(2).
2. Liu L, Wu J, Geng J, Yuan Z, Huang D. Geographical prevalence and risk factors for pterygium: a systemic review and meta-analysis. *BMJ Open*. 2013; 3(11):e003787. <https://doi.org/10.1136/bmjopen-2013-003787> PMID: 24253031
3. Fotouhi A, Hashemi H, Khabazkhoob M, Mohammad K. Prevalence and risk factors of pterygium and pinguecula. the Tehran Eye Study. *Eye*. 2009; 23:1125–29. <https://doi.org/10.1038/eye.2008.200> PMID: 18600244
4. Gazzard G, Saw S-M, Farook M, Koh D, Widjaja D, Chia S-E, et al. Pterygium in Indonesia: prevalence, severity and risk factors. *Br J Ophthalmol* 2002; 86:1341–6. PMID: 12446360
5. Durkin SR, Abhary S, Newland HS, Selva D, Aung T, Casson RJ. The prevalence, severity and risk factors for pterygium in central Myanmar: the Meiktila Eye Study. *Br J Ophthalmol*. 2008; 92:25–9. <https://doi.org/10.1136/bjo.2007.119842> PMID: 18055574
6. Sarac O, Toklu Y, Sahin M. The prevalence of pterygium in Ankara: a hospital based study. *Turk J Med Sci*. 2012; 42(6): 1006–09.
7. Ukponmwan CU, Dawudo OA, Edema OF, Okojie O. Prevalence of pterygium and pingueculum among motorcyclist in Nigeria. *East African Medical Journal*. 2007; 84(11):516–21. PMID: 18303743
8. Meseret A, Bejiga A, Ayalew M. Prevalence of Pterygium in a rural community of Meskan District, Southern Ethiopia. *Ethiopia.J.Health Dev*. 2008; 22(2): 191–94.
9. Shiromaa H, Higa A, Sawaguchi S, Iwase A, Tomidokoro A, Amano S, et al. Prevalence and Risk Factors of Pterygium in a Southwestern Island of Japan: The Kumejima Study. *American Journal of Ophthalmology*. 2009 November; 148(5):766–71. <https://doi.org/10.1016/j.ajo.2009.06.006> PMID: 19664753
10. Nangia V, Jonas JB, Nair D, Saini N, Nangia P, Panda-Jonas S. Prevalence and Associated Factors for Pterygium in Rural Agrarian Central India. *The Central India Eye and Medical Study*. *PLoS ONE*. 2013; 8(12):e82439. <https://doi.org/10.1371/journal.pone.0082439> PMID: 24324789
11. Lu P, Chen X-M. Prevalence and risk factors of pterygium. Review. *International Journal of ophthalmology*. 2009; 2(1):82–5.
12. Panchapakesan J, Hourihan F, Mitchell P. The prevalence of pterygium and pinguecula: the Blue Mountains Eye Study. *Aust N Z J Ophthalmol*. 1998 May; 26 Suppl 1:S2–5.
13. Paula JS, Thorn F, Cruz AA. Prevalence of pterygium and cataract in indigenous populations of Brazilian Amazon forest. *Eye (Lond)*. 2006 May; 20(5):533–6.
14. Wu K, He M, Xu J, Li S. Pterygium in aged population in Doumen County, China. *Eye science(Yanke Xua Bao)*. 2002 september; 18(3):181–4.
15. Luthra R, Nemesure BB, Wu S-Y, Xie SH, Leske MC. Frequency and Risk Factors for Pterygium in the Barbados Eye Study 2001; 119(12):1872–32.
16. Li Z, Cui H. Prevalence of pterygium and associated factors of pterygium in a rural adult population(the Southern Harbin Eye Study). *Cornea*. 2013 Jun; 32(6):806–9.
17. Ke M, Liang X, Ying J, Jost JB. Prevalence of and factors associated with pterygium in adult Chinese: the Beijing Eye Study. *Cornea*. 2007 December; 26(10):1184–86. <https://doi.org/10.1097/ICO.0b013e318151f9c6> PMID: 18043173
18. Dushku N, Reid TW. Immunohistochemical evidence that human pterygia originate from an invasion of vimentin-expressing altered limbal epithelial basal cells. *Curr Eye Res*. 1994 July; 13(7):473–81. PMID: 7924411



19. Nemesure B, Wu SY, Hennis A, Leske MC. Nine-Year Incidence and Risk Factors for Pterygium in the Barbados Eye Studies. *Ophthalmology*. 2008; 115(12):2153–8. <https://doi.org/10.1016/j.ophtha.2008.08.003> PMID: [18930552](https://pubmed.ncbi.nlm.nih.gov/18930552/)
20. Anguria P, Ntuli S, Interwicz B, Carmichael T. Traditional eye medication and pterygium occurrence in Limpopo Province. *SAMJ: South African Medical Journal*. 2012; 102(8).
